# Supplementary material for: Towards the validation of high-throughput sequencing (HTS) for routine plant virus diagnostics: measurement of variation linked to HTS detection of citrus viruses and viroids
Source: Virol J. 2021 Mar 22;18:61. doi: 10.1186/s12985-021-01523-1 (PMC7986492; doi:10.1186/s12985-021-01523-1)
Supplement: Supplementary file 1 — Additional file 1Species and strain-specific primer sequences used in a two-step RT-PCR to amplify citrus viruses and viroids. [file 12985_2021_1523_MOESM1_ESM.xlsx]

## Sheet: Additional file 1
Additional file 1 Species and strain-specific primer sequences used in a two-step RT-PCR to amplify citrus viruses and viroids
Assay/Primer name	Polarity	Primer sequences from 5’ to 3’	Annealing temperature (°C)	Product size (bp)	Reference
CiVA RNA1 77F	Sense	CTTCTCTGTTGGTTCCTTGA	55	967	Bester et al. 2021
CiVA RNA1 1043R	Anti-sense	TGCCTCATCTAATTGTTGCT
CiVA RNA2 5148F	Sense	GAGAATGACAAGTATGACCA	55	876	Bester et al. 2021
CiVA RNA2 6023R	Anti-sense	ACAGAAGAATGACAATAGCA
HSVd Mike2R	Sense	GACGAACCGAGAGGTGATG	56	185	Barry Manicom (personal communication)
HSVd Mike2F	Anti-sense	GACTTACCTGAGAAAGGAGCC
CDVd CM3 (R)	Sense	TCGACGACGACAGGTAAGTT	56	295	Adapted from Rakowski et al., 1994
CDVd CP3 (F)	Anti-sense	CGAAGGCAGCTAAGTTGGTGA
CEVd CEV R2	Sense	TCTCCGCTGGACGCCAGTGA	60	160	CRI
CEVd CEV F/Smike-F	Anti-sense	CTTGAGGTTCCTGTGGTGCT
CTLV AM (R)	Sense	TAGAAAAACCACACTAACCCGGAAATGC	62	456	Yoshikawa et al. 1992
CTLV-AP (F)	Anti-sense	CCTGAATTGAAAACCTTTGCTGCCACTT
CTV generic	Sense	TCTGATTGAAGTGGACGGAATAAG	62	157	Cook et al. 2016
	Antisense	GCTTAGACCAACGAGAGGATA
RB: group1a	Sense	AGTGGTGGAGATTACGTTG	60	628	Cook et al. 2016
	Anti-sense	TACACGCGACAAATCGAG
RB: group 2b	Sense	CGGAAGGGACTACGTGGT	60	658	Cook et al. 2016
	Anti-sense	CGTTTGCACGGGTTCAATG
T36	Sense	GGTGTAAGGAAGCGTGTGTCGCATTTA	66	537	Cook et al. 2016
	Anti-sense	ACCTGCACCGTCTAACAACATCATCG
HA16-5	Sense	CGACAAGTGCATTACGTCTCAG	56	176	Cook et al. 2016
	Anti-sense	GTAAGTATCTAAAACCAGGAG
T68 (B165)	Sense	GTTAAGAAGGATCACCATCTTGACGTTGA	64	510	Roy et al. 2010
	Anti-sense	AAAATGCACTGTAACAAGACCCGACTC
T3	Sense	GTTATCACGCCTAAAGTTTGGTACCACT	60	409	Roy et al. 2010
	Anti-sense	CATGACATCGAAGATAGCCGAAGC
VT	Sense	TTTGAAAATGGTGATGATTTCGCCGTCA	60	302	Roy et al. 2010
	Anti-sense	GACACCGGAACTGCYTGAACAGAGT
T30	Sense	TGTTGCGAAACTAGTTGACCCTACTG	60	206	Roy et al. 2010
	Anti-sense	TAGTGGGCAGAGTGCCAAAAGAGAT
S1	Sense	CGACGAGTATATGAAGGACAAC	52	715	CRI
	Anti-sense	GAAAACCCGTAGCTGTCTAATGC
LibUF	Sense	GGCAGGCCTAACACATGC	58	96	Roberts et al. 2015
HLBr	Anti-sense	GCGTTATCCCGTAGAAAAAGGTAG			Li et al. 2006
HLBp	Probe	56-FAM/AGACGGGTGAGTAACGCG/3BHQ_1
aRB group 1 includes genotypes NZRB-TH28, NZRB-M12, NZRB-G90 and HA18-9.
bRB group 2 includes genotypes NZRB-TH30, NZRB-M17 and Taiwan-Pum/SP/T1.
Bester R, Karaan M, Cook G, Maree HJ. First report of citrus virus A in citrus in South Africa. Journal of Citrus Pathology [Internet]. 2021;8. Available from: https://escholarship.org/uc/item/5gr6p8zh
Cook G, van Vuuren SP, Breytenbach JHJ, Burger JT, Maree HJ. Expanded Strain-Specific RT-PCR Assay for Differential Detection of Currently Known Citrus Tristeza Virus Strains: a Useful Screening Tool. Journal of Phytopathology. 2016;164:847–51.
Rakowski AG, Szychowski JA, Avena ZS, Semancik JS. Nucleotide sequence and structural features of the Group III citrus viroids. Journal of General Virology. 1994;75:3581–4.
Yoshikawa N, Sasaki E, Kato M, Takahashi T. The nucleotide sequence of apple stem grooving capillovirus genome. Virology. 1992;191:98–105.
Roy A, Ananthakrishnan G, Hartung JS, Brlansky RH. Development and Application of a Multiplex Reverse-Transcription Polymerase Chain Reaction Assay for Screening a Global Collection of Citrus tristeza virus Isolates. Phytopathology. 2010;100:1077–88.
CRI: Citrus Research International
Roberts R, Steenkamp ET, Pietersen G. Three novel lineages of ‘Candidatus Liberibacter africanus’ associated with native rutaceous hosts of Trioza erytreae in South Africa. International Journal of Systematic and Evolutionary Microbiology. 2015;65:723–31.
Li W, Hartung JS, Levy L. Quantitative real-time PCR for detection and identification of Candidatus Liberibacter species associated with citrus huanglongbing. Journal of Microbiological Methods. 2006;66:104–15.
