# Supplementary material for: Towards the validation of high-throughput sequencing (HTS) for routine plant virus diagnostics: measurement of variation linked to HTS detection of citrus viruses and viroids
Source: Virol J. 2021 Mar 22;18:61. doi: 10.1186/s12985-021-01523-1 (PMC7986492; doi:10.1186/s12985-021-01523-1)
Supplement: Supplementary file 4 — Additional file 4Statistical tests performed using the Kruskal-Wallis rank sum test between the data distributions of the different extraction methods and sequencing platform data sets based on transcripts per million (TPM) counts per gene analysed. Significant differences are indicated in bold if the p value < 0.05. [file 12985_2021_1523_MOESM4_ESM.xlsx]

## Sheet: Additional file 4
Additional file 4 Statistical tests performed using the Kruskal-Wallis rank sum test between the data distributions of the different extraction methods and sequencing platform data sets based on transcripts per million (TPM) counts per gene analysed. Significant differences are indicated in bold if the p value < 0.05.
Comparison	Gene
	ACT2	TUB	UBC21	GAPC2	Unknown	FBOX	DIM1	EF-1a	SAND	UBC9	PTB1	UPL7
CTAB vs. Zymo Research kit	0.5217	0.8211	0.0003	0.0972	0.7344	0.0765	0.9399	0.0458	0.0005	0.3657	0.763	0.91
Illumina vs. Ion Torrent	0.0001	0.0744	0.0167	0	0	0	0	0	0.0264	0.0002	0.0001	0
CTAB/Illumina vs Zymo Rearch/Illumina	0.3555	0.6441	0.0007	0.0243	0.4528	0.0111	0.729	0.0079	0.0039	0.2726	0.9539	0.9081
CTAB/Ion Torrent vs Zymo Rearch/Ion Torrent	0.5637	0.5637	0.1489	0.1489	0.3865	0.3865	0.2482	0.0433	0.0209	1	0.0209	0.1489
CTAB/Illumina vs. CTAB/Ion Torrent	0.0036	0.4669	0.0053	0.0036	0.0036	0.0036	0.0036	0.0036	0.0212	0.0036	0.0036	0.0036
ZymoResearch/Illumina vs. ZymoResearch/Ion Torrent	0.0076	0.1146	0.0687	0.0036	0.0036	0.0036	0.0036	0.0036	0.0289	0.0152	0.0391	0.0036
Healthy vs. Infected	0.0744	0.0003	0.0367	0.0676	0.0896	0.0408	0.7606	0.384	0.0676	0.4594	0.0817	0.0817
Healthy Illumina vs Infected Illumina	0.0278	0.0004	0.0387	0.0076	0.0093	0.0033	0.6891	0.286	0.0063	0.386	0.0196	0.0234
Healthy Ion Torrent vs Infected Ion Torrent	0.0455	0.0956	0.505	0.505	0.7389	0.3173	0.7389	0.1824	0.3173	0.7389	0.505	0.0455
