# Supplementary material for: Towards the validation of high-throughput sequencing (HTS) for routine plant virus diagnostics: measurement of variation linked to HTS detection of citrus viruses and viroids
Source: Virol J. 2021 Mar 22;18:61. doi: 10.1186/s12985-021-01523-1 (PMC7986492; doi:10.1186/s12985-021-01523-1)
Supplement: Supplementary file 5 — Additional file 5The subset sizes for which the respective accession obtained a 90% and 95% genome coverage for all sample and subset replicates with read mapping per RNA extraction method and sequencing platform protocol. [file 12985_2021_1523_MOESM5_ESM.xlsx]

## Sheet: Additional file 5
Additional file 5 The subset sizes for which the respective accession obtained a 90% and 95% genome coverage for all sample and subset replicates with read mapping per RNA extraction method and sequencing platform protocol.
	CTAB/Illumina			Zymo Research/Illumina			CTAB/Ion Torrent			Zymo Research/Ion Torrent
	90% coverage	95% coverage	Average percentage coverage (10000000 reads)	90% coverage	95% coverage	Average percentage coverage (10000000 reads)	90% coverage	95% coverage	Average percentage coverage (10000000 reads)	90% coverage	95% coverage	Average percentage coverage (10000000 reads)
Pathogens accession
CiVA RNA1	1000000	5000000	99.83	5000000	5000000	99.77	5000000	10000000	99.75	10000000		98.55
CiVA RNA2	1000000	5000000	99.78	5000000	5000000	99.72	5000000	10000000	98.85	5000000	5000000	99.54
CDVd	5000000		97.37	1000000	5000000	98.49			96.95	10000000	10000000	98.71
CEVd	500000	5000000	100	100000	500000	100	5000000	5000000	100	5000000		99.56
CTLV	5000000	5000000	99.46	10000000	10000000	98.96	10000000	10000000	98.71			89.61
CTV RB	50000	50000	100	500000	500000	100	1000000	1000000	100	100000	500000	100
CTVT68			71.33			66			78.32			71.45
HSVd	1000000	1000000	100	500000	500000	100	5000000	5000000	100	5000000	5000000	100
HSVd (Cachexia)			32.73			41.44			19.31			31.02
Gene accessions
SAND			83.05			75.2			51.05			47.29
DIM1			83.43			88.54			72.95			78.73
N/A			97.11			95.97			50.35			56.37
FBOX			69.52			57.85			27.62			26.78
UPL7	10000000		97.28			96.37			63.51			59.99
UBC21			87.43			88.88			63.19			75.59
PTB1	10000000		96.03			94.49			72.68			76.4
GAPC2	500000	5000000	97.49	1000000	5000000	97.11	10000000		95.02	5000000		95.73
UBC9			95.28	10000000		93.93			84.87			88.49
ACT2	5000000		99.41	1000000	5000000	99.3	10000000		96.82	5000000		96.84
EF-1a	5000000		95.36	5000000		95.64			93.01			92.69
TUB			93.94			93.43			84.85			85.47
